# Supplementary material for: Using near-surface atmospheric measurements as a proxy for quantifying field-scale soil gas flux
Source: Copernicus journal article supplement (doi:10.5194/gi-9-483-2020), 2020-12-18
Supplement: Supplementary file 1 [file gi-9-483-2020-supplement.pdf]

Supplement of Geosci. Instrum. Method. Data Syst., 9, 483–490, 2020  
<https://doi.org/10.5194/gi-9-483-2020-supplement>  
© Author(s) 2020. This work is distributed under  
the Creative Commons Attribution 4.0 License.

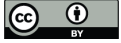

*Supplement of*

## **Using near-surface atmospheric measurements as a proxy for quantifying field-scale soil gas flux**

**Andrew Barkwith et al.**

*Correspondence to:* Andrew Barkwith (andr3@bgs.ac.uk)

The copyright of individual parts of the supplement might differ from the CC BY 4.0 License.

### Wind variables against CO<sup>2</sup> flux differences

It is a reasonable assumption that wind speed and direction could influence the collection of flux data using the open-field method. To assess the impacts we have plotted the difference in CO<sub>2</sub> flux for each measurement location described in the main manuscript against wind speed and wind direction (Fig. S1 and Fig. S2). Regression analysis reveals R<sup>2</sup> values of close to zero (all below 0.05), suggesting that there is no relationship between the observed difference in CO<sub>2</sub> flux and wind direction or wind speed.

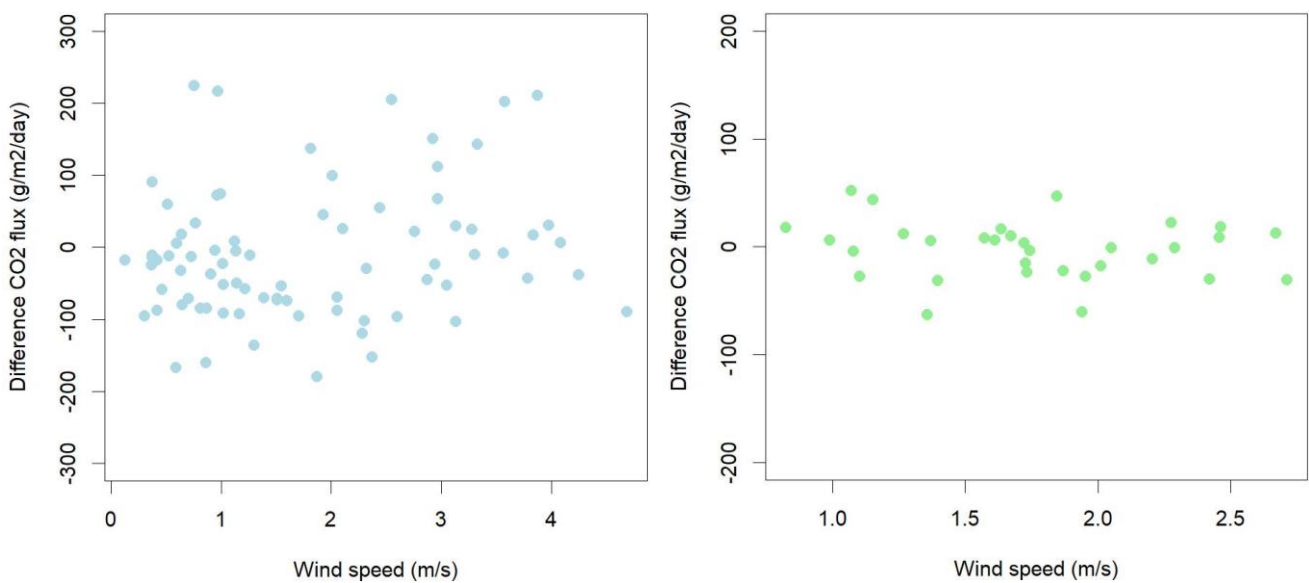

Figure S1: Wind speed plotted against difference in CO<sub>2</sub> flux for the Ailano, blue (left), and Sutton Bonington, green (right).

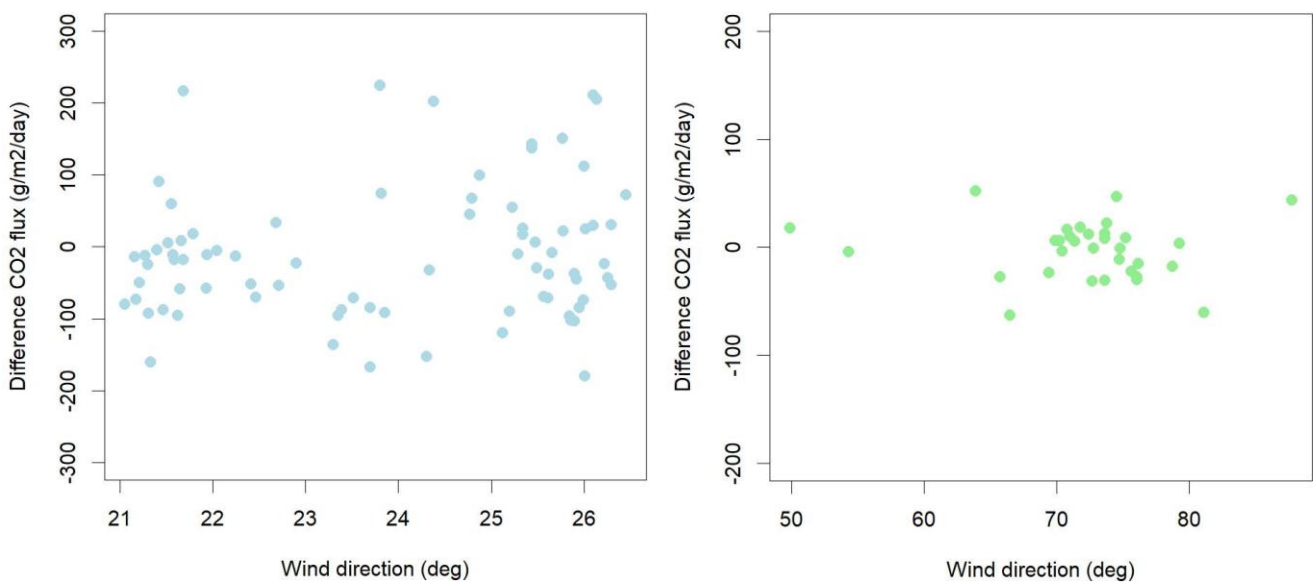

Figure S2: Wind direction plotted against difference in CO<sub>2</sub> flux for the Ailano, blue (left), and Sutton Bonington, green (right).
